# Supplementary material for: Profile and treatment outcomes among young patients with tuberculosis aged 15–24 years in Faridabad district of Haryana, India
Source: HighWire-hosted journal article supplement (doi:10.1136/bmjopen-2021-060363), 2022-09-01
Supplement: bmjopen-2021-060363supp001_data_supplement.pdf [file bmjopen-2021-060363supp001_data_supplement.pdf]

**Supplemental material. Table. 1. Distribution of TB patients according to key variables (N=5257)**

|                       |                 | Age in Years             |                          |                          |                          |                          |                          |                          |                          |                          |                          | Total             |
|-----------------------|-----------------|--------------------------|--------------------------|--------------------------|--------------------------|--------------------------|--------------------------|--------------------------|--------------------------|--------------------------|--------------------------|-------------------|
|                       |                 | 15<br>(n=528)<br>No. (%) | 16<br>(n=429)<br>No. (%) | 17<br>(n=508)<br>No. (%) | 18<br>(n=651)<br>No. (%) | 19<br>(n=411)<br>No. (%) | 20<br>(n=669)<br>No. (%) | 21<br>(n=448)<br>No. (%) | 22<br>(n=700)<br>No. (%) | 23<br>(n=470)<br>No. (%) | 24<br>(n=443)<br>No. (%) | N=5257<br>No. (%) |
| Sex                   | Male            | 161<br>(30.5)            | 155(36.1)                | 247(48.6)                | 325(49.9)                | 214(52.1)                | 340(50.8)                | 219(48.9)                | 355(50.7)                | 214(45.5)                | 230(51.9)                | 2460 (46.8)       |
|                       | Female          | 367(69.5)                | 274(63.9)                | 261(51.4)                | 326(50.1)                | 197(47.9)                | 329(49.2)                | 229(51.1)                | 345(49.3)                | 256(54.5)                | 213(48.1)                | 2797 (53.2)       |
| Type of TB            | Pulmonary       | 295(55.9)                | 270(62.9)                | 287(56.5)                | 422(64.8)                | 236(57.4)                | 403(60.2)                | 242(54.1)                | 427(61)                  | 265(56.4)                | 241(54.4)                | 3088(58.7)        |
|                       | Extra-pulmonary | 233(44.1)                | 159(37.1)                | 221(43.5)                | 229(35.2)                | 175(42.6)                | 266(39.8)                | 206(45.9)                | 273(39)                  | 205(43.6)                | 202(45.6)                | 2169(41.3)        |
| Category of Treatment | I               | 476(90.1)                | 358(83.4)                | 436(85.8)                | 553(84.9)                | 344(83.7)                | 549(82.1)                | 370(82.6)                | 563(80.4)                | 385(81.9)                | 363(81.9)                | 4,397(83.6)       |
|                       | II              | 52(9.9)                  | 71(16.6)                 | 72(14.2)                 | 98(15.1)                 | 67(16.3)                 | 120(17.9)                | 78(17.4)                 | 137(19.6)                | 85(18.1)                 | 80(18.1)                 | 860(16.4)         |
|                       | Yes             | 64(12.1)                 | 77(17.9)                 | 76(14.9)                 | 107(16.4)                | 73(17.8)                 | 125(18.7)                | 86(19.2)                 | 148(21.2)                | 92(19.6)                 | 87(19.6)                 | 935(17.8)         |

|                        |                                |           |           |           |           |           |           |           |           |           |           |            |
|------------------------|--------------------------------|-----------|-----------|-----------|-----------|-----------|-----------|-----------|-----------|-----------|-----------|------------|
| <b>Past H/O of TB</b>  | <b>No</b>                      | 464(87.9) | 352(82.1) | 432(85.1) | 544(83.6) | 338(82.2) | 544(81.3) | 362(80.8) | 552(78.8) | 378(80.4) | 356(80.4) | 4322(82.2) |
| <b>Type of Patient</b> | <b>New</b>                     | 476(90.2) | 358(83.4) | 436(85.8) | 553(84.9) | 344(83.7) | 549(82.1) | 370(82.7) | 563(80.4) | 385(81.9) | 363(82)   | 4397(83.6) |
|                        | <b>Relapse</b>                 | 15(2.8)   | 16(3.7)   | 21(4.2)   | 29(4.4)   | 19(4.6)   | 45(6.7)   | 28(6.2)   | 35(5.0)   | 26(5.5)   | 27(6.2)   | 261(4.9)   |
|                        | <b>Treatment After Default</b> | 12(2.3)   | 15(3.5)   | 14(2.7)   | 22(3.4)   | 13(3.3)   | 21(3.1)   | 13(2.9)   | 29(4.1)   | 14(2.9)   | 22(5)     | 175(3.3)   |
|                        | <b>Failure</b>                 | 4(0.7)    | 7(1.6)    | 6(1.2)    | 5(0.8)    | 5(1.2)    | 2(0.3)    | 2(0.4)    | 13(1.8)   | 5(1.2)    | 0(0.0)    | 49(1)      |
|                        | <b>others</b>                  | 21(3.9)   | 32(7.5)   | 31(6.1)   | 40(6.1)   | 29(7.2)   | 52(7.8)   | 35(7.8)   | 60(8.7)   | 40(8.6)   | 30 (6.8)  | 375(7.2)   |
| <b>Sputum smear</b>    | <b>Positive</b>                | 168(56.9) | 150(55.6) | 164(57.1) | 245(58.1) | 133(56.4) | 242(60.1) | 138(57.1) | 251(58.8) | 141(53.2) | 148(61.4) | 1775(56.8) |
|                        | <b>Negative</b>                | 127(43.1) | 120(44.4) | 123(42.9) | 177(41.9) | 103(43.6) | 161(39.9) | 104(42.9) | 176(41.2) | 124(46.8) | 93(38.6)  | 1313(42.2) |
| <b>HIV status</b>      | <b>Positive</b>                | 0(0.0)    | 1(0.2)    | 1(0.2)    | 0(0.0)    | 1(0.2)    | 1(0.2)    | 0(0.0)    | 3(0.4)    | 1(0.2)    | 0(0.0)    | 8 (0.2)    |
|                        | <b>Negative</b>                | 450(85.2) | 358(83.5) | 402(79.1) | 544(83.6) | 348(84.7) | 532(79.5) | 364(81.3) | 555(79.3) | 375(79.8) | 355(80.1) | 4283(81.5) |
|                        | <b>Unknown</b>                 | 78(14.8)  | 70(16.3)  | 10(20.7)  | 107(16.4) | 62(15.1)  | 136(20.3) | 84(18.7)  | 142(20.3) | 94(20)    | 88(19.9)  | 966(18.3)  |

**Table 2. Distribution of TB patients according age and treatment outcome (n=5257)**

| Treatment outcome             | Age Group in years              |                                 |                                 |                                 |                                 |                                 |                                 |                                 |                                 |                                 | Total                    |
|-------------------------------|---------------------------------|---------------------------------|---------------------------------|---------------------------------|---------------------------------|---------------------------------|---------------------------------|---------------------------------|---------------------------------|---------------------------------|--------------------------|
|                               | <b>15</b><br>(n=528)<br>No. (%) | <b>16</b><br>(n=429)<br>No. (%) | <b>17</b><br>(n=508)<br>No. (%) | <b>18</b><br>(n=651)<br>No. (%) | <b>19</b><br>(n=411)<br>No. (%) | <b>20</b><br>(n=669)<br>No. (%) | <b>21</b><br>(n=448)<br>No. (%) | <b>22</b><br>(n=700)<br>No. (%) | <b>23</b><br>(n=470)<br>No. (%) | <b>24</b><br>(n=443)<br>No. (%) | <b>N=5257</b><br>No. (%) |
| <b>Cured</b>                  | 154(29.2)                       | 140(32.6)                       | 147(28.9)                       | 223(34.2)                       | 118(28.7)                       | 225(33.6)                       | 124(27.7)                       | 216(30.8)                       | 142(30.2)                       | 131(29.6)                       | 1620(30.8)               |
| <b>Treatment Completed</b>    | 343(64.9)                       | 264(61.6)                       | 327(64.4)                       | 376(57.7)                       | 266(64.7)                       | 398(59.5)                       | 295(65.9)                       | 426(60.8)                       | 302(64.2)                       | 282(63.6)                       | 3279(62.4)               |
| <b>Failure</b>                | 4(0.7)                          | 5(1.2)                          | 1(0.2)                          | 6(0.9)                          | 5(1.2)                          | 6(0.9)                          | 0(0.0)                          | 6(0.8)                          | 1(0.2)                          | 3(0.7)                          | 37(0.7)                  |
| <b>Defaulted</b>              | 13(2.6)                         | 9(2.1)                          | 19(3.7)                         | 24(3.8)                         | 12(2.9)                         | 28(4.2)                         | 15(3.3)                         | 24(3.4)                         | 4(0.8)                          | 14(3.1)                         | 162(3.1)                 |
| <b>Died</b>                   | 9(1.7)                          | 1(0.2)                          | 9(1.9)                          | 12(1.9)                         | 7(1.8)                          | 8(1.3)                          | 5(1.1)                          | 12(1.7)                         | 11(2.3)                         | 7(1.7)                          | 81(1.5)                  |
| <b>Shifted to Category IV</b> | 4(0.7)                          | 9(2.2)                          | 5(0.9)                          | 9(1.4)                          | 2(0.5)                          | 3(0.4)                          | 6(1.3)                          | 14(2.0)                         | 7(1.5)                          | 5(1.1)                          | 64(1.2)                  |
| <b>Transferred out</b>        | 1(0.2)                          | 1(0.1)                          | 0(0.0)                          | 1(0.1)                          | 1(0.2)                          | 1(0.1)                          | 3(0.7)                          | 2(0.3)                          | 3(0.7)                          | 1(0.2)                          | 14(0.3)                  |
| <b>Total</b>                  | 528                             | 429                             | 508                             | 651                             | 411                             | 669                             | 448                             | 700                             | 470                             | 443                             | 5257                     |
